# Supplementary material for: The use of complementary and alternative medicine among hypertensive and type 2 diabetic patients in Western Jamaica: A mixed methods study
Source: PubMed Central journal article supplement (PMC7870151; doi:10.1371/journal.pone.0245163), 2021-02-08

# PLOS ONE

## The Use of Complementary and Alternative Medicine among Hypertensive and Type 2 Diabetic Patients in Western Jamaica: A Mixed Methods Study --Manuscript Draft--

|                                                                                      |                                                                                                                                                                                                                                                                                                                                                                                                                                                                                                                                                                                                                                                                                                                                                                                                                                                                                                                                                                                                                                                                                                                                                                                                                                                                                                                                                                                                                                                                                                                                                                                                                                                                                                                                                                                                                                                                                                                                                                                                                                                                                                                                                                                 |
|--------------------------------------------------------------------------------------|---------------------------------------------------------------------------------------------------------------------------------------------------------------------------------------------------------------------------------------------------------------------------------------------------------------------------------------------------------------------------------------------------------------------------------------------------------------------------------------------------------------------------------------------------------------------------------------------------------------------------------------------------------------------------------------------------------------------------------------------------------------------------------------------------------------------------------------------------------------------------------------------------------------------------------------------------------------------------------------------------------------------------------------------------------------------------------------------------------------------------------------------------------------------------------------------------------------------------------------------------------------------------------------------------------------------------------------------------------------------------------------------------------------------------------------------------------------------------------------------------------------------------------------------------------------------------------------------------------------------------------------------------------------------------------------------------------------------------------------------------------------------------------------------------------------------------------------------------------------------------------------------------------------------------------------------------------------------------------------------------------------------------------------------------------------------------------------------------------------------------------------------------------------------------------|
| <b>Manuscript Number:</b>                                                            | PONE-D-20-21696                                                                                                                                                                                                                                                                                                                                                                                                                                                                                                                                                                                                                                                                                                                                                                                                                                                                                                                                                                                                                                                                                                                                                                                                                                                                                                                                                                                                                                                                                                                                                                                                                                                                                                                                                                                                                                                                                                                                                                                                                                                                                                                                                                 |
| <b>Article Type:</b>                                                                 | Research Article                                                                                                                                                                                                                                                                                                                                                                                                                                                                                                                                                                                                                                                                                                                                                                                                                                                                                                                                                                                                                                                                                                                                                                                                                                                                                                                                                                                                                                                                                                                                                                                                                                                                                                                                                                                                                                                                                                                                                                                                                                                                                                                                                                |
| <b>Full Title:</b>                                                                   | The Use of Complementary and Alternative Medicine among Hypertensive and Type 2 Diabetic Patients in Western Jamaica: A Mixed Methods Study                                                                                                                                                                                                                                                                                                                                                                                                                                                                                                                                                                                                                                                                                                                                                                                                                                                                                                                                                                                                                                                                                                                                                                                                                                                                                                                                                                                                                                                                                                                                                                                                                                                                                                                                                                                                                                                                                                                                                                                                                                     |
| <b>Short Title:</b>                                                                  | CAM use for hypertension and type 2 diabetes mellitus                                                                                                                                                                                                                                                                                                                                                                                                                                                                                                                                                                                                                                                                                                                                                                                                                                                                                                                                                                                                                                                                                                                                                                                                                                                                                                                                                                                                                                                                                                                                                                                                                                                                                                                                                                                                                                                                                                                                                                                                                                                                                                                           |
| <b>Corresponding Author:</b>                                                         | Pauline Jolly, PhD, MPH<br>University of Alabama at Birmingham<br>Birmingham, Alabama UNITED STATES                                                                                                                                                                                                                                                                                                                                                                                                                                                                                                                                                                                                                                                                                                                                                                                                                                                                                                                                                                                                                                                                                                                                                                                                                                                                                                                                                                                                                                                                                                                                                                                                                                                                                                                                                                                                                                                                                                                                                                                                                                                                             |
| <b>Keywords:</b>                                                                     | alternative medicine; hypertension; type 2 diabetes mellitus; jamaica                                                                                                                                                                                                                                                                                                                                                                                                                                                                                                                                                                                                                                                                                                                                                                                                                                                                                                                                                                                                                                                                                                                                                                                                                                                                                                                                                                                                                                                                                                                                                                                                                                                                                                                                                                                                                                                                                                                                                                                                                                                                                                           |
| <b>Abstract:</b>                                                                     | <p>Background: Hypertension and type 2 diabetes mellitus are among the top ten causes of death among Jamaicans. The simultaneous use of alternative treatments and prescription medications for these conditions is common in Jamaica. Objectives : To identify beliefs and practices associated with the use of alternative treatments for hypertension and type 2 diabetes mellitus among patients. Methods: A mixed methods study including an investigator- administered survey and focus group discussion sessions was conducted among patients ≥18 years. The quantitative data was summarized and a thematic analysis procedure was conducted to analyze the qualitative data using NVivo. Results : Participants in the study were mostly women (75%) and most (87-90%) were on prescription medication for their condition. Of survey participants, 69% reported taking their medication as prescribed and 70% felt their prescription medicine was controlling their condition. Almost all (98%) reported using CAM, mainly herbal medications, and most (73-80%) felt that herbal medicines controlled their conditions; one-third believed that CAM is the most effective form of treatment and should always be used instead of prescription medication. However, most participants (85.1%) did not believe that prescription medication and CAM should be used simultaneously. Only 10% -24% of participants reported discussing CAM with their healthcare providers. Four themes emerged from the focus group sessions: 1) Simultaneous use of herbal and prescription medicine was perceived to be harmful, 2) Patients did not divulge their use of herbal medicine to healthcare providers, 3) Alternative medicines were perceived to be highly effective, and 4) Religiosity and family elders played key roles in herbal use. Conclusions: This study showed that CAM, mainly herbal medicines, is widely used by patients who have strong beliefs that alternative treatments control their disease. Training healthcare providers in CAM so that they can appropriately advise patients will improve managements of chronic diseases among patients.</p> |
| <b>Order of Authors:</b>                                                             | <p>Omolade Adeniyi</p> <p>LaTimberly Washington</p> <p>Sarah Franklin</p> <p>Maung Aung</p> <p>Soumya Niranjana</p> <p>Pauline Jolly, PhD, MPH</p>                                                                                                                                                                                                                                                                                                                                                                                                                                                                                                                                                                                                                                                                                                                                                                                                                                                                                                                                                                                                                                                                                                                                                                                                                                                                                                                                                                                                                                                                                                                                                                                                                                                                                                                                                                                                                                                                                                                                                                                                                              |
| <b>Additional Information:</b>                                                       |                                                                                                                                                                                                                                                                                                                                                                                                                                                                                                                                                                                                                                                                                                                                                                                                                                                                                                                                                                                                                                                                                                                                                                                                                                                                                                                                                                                                                                                                                                                                                                                                                                                                                                                                                                                                                                                                                                                                                                                                                                                                                                                                                                                 |
| <b>Question</b>                                                                      | <b>Response</b>                                                                                                                                                                                                                                                                                                                                                                                                                                                                                                                                                                                                                                                                                                                                                                                                                                                                                                                                                                                                                                                                                                                                                                                                                                                                                                                                                                                                                                                                                                                                                                                                                                                                                                                                                                                                                                                                                                                                                                                                                                                                                                                                                                 |
| <b>Financial Disclosure</b>                                                          | This study was supported by the Minority Health International Research Training (MHIRT) grant no. T37-MD001448 from the National Institute on Minority Health and Health Disparities, National Institutes of Health (NIH), Bethesda, Maryland, USA, and the Western Regional Health Authority, Ministry of Health, Jamaica.                                                                                                                                                                                                                                                                                                                                                                                                                                                                                                                                                                                                                                                                                                                                                                                                                                                                                                                                                                                                                                                                                                                                                                                                                                                                                                                                                                                                                                                                                                                                                                                                                                                                                                                                                                                                                                                     |
| Enter a financial disclosure statement that describes the sources of funding for the |                                                                                                                                                                                                                                                                                                                                                                                                                                                                                                                                                                                                                                                                                                                                                                                                                                                                                                                                                                                                                                                                                                                                                                                                                                                                                                                                                                                                                                                                                                                                                                                                                                                                                                                                                                                                                                                                                                                                                                                                                                                                                                                                                                                 |

work included in this submission. Review the [submission guidelines](#) for detailed requirements. View published research articles from [PLOS ONE](#) for specific examples.

This statement is required for submission and **will appear in the published article** if the submission is accepted. Please make sure it is accurate.

#### Unfunded studies

Enter: *The author(s) received no specific funding for this work.*

#### Funded studies

Enter a statement with the following details:

- Initials of the authors who received each award
- Grant numbers awarded to each author
- The full name of each funder
- URL of each funder website
- Did the sponsors or funders play any role in the study design, data collection and analysis, decision to publish, or preparation of the manuscript?
- **NO** - Include this sentence at the end of your statement: *The funders had no role in study design, data collection and analysis, decision to publish, or preparation of the manuscript.*
- **YES** - Specify the role(s) played.

\* typeset

#### Competing Interests

Use the instructions below to enter a competing interest statement for this submission. On behalf of all authors, disclose any [competing interests](#) that could be perceived to bias this work—acknowledging all financial support and any other relevant financial or non-financial competing interests.

This statement **will appear in the published article** if the submission is accepted. Please make sure it is accurate. View published research articles from [PLOS ONE](#) for specific examples.

The authors have declared that no competing interests exist.

**NO authors have competing interests**

Enter: *The authors have declared that no competing interests exist.*

**Authors with competing interests**

Enter competing interest details beginning with this statement:

*I have read the journal's policy and the authors of this manuscript have the following competing interests: [insert competing interests here]*

\* typeset

**Ethics Statement**

Enter an ethics statement for this submission. This statement is required if the study involved:

- Human participants
- Human specimens or tissue
- Vertebrate animals or cephalopods
- Vertebrate embryos or tissues
- Field research

Write "N/A" if the submission does not require an ethics statement.

General guidance is provided below. Consult the [submission guidelines](#) for detailed instructions. **Make sure that all information entered here is included in the Methods section of the manuscript.**

The study was approved by the Institutional Review Board at the University of Alabama at Birmingham and by the Western Regional Health Authority; protocol approval #IRB-170310006.

**Format for specific study types**

**Human Subject Research (involving human participants and/or tissue)**

- Give the name of the institutional review board or ethics committee that approved the study
- Include the approval number and/or a statement indicating approval of this research
- Indicate the form of consent obtained (written/oral) or the reason that consent was not obtained (e.g. the data were analyzed anonymously)

**Animal Research (involving vertebrate animals, embryos or tissues)**

- Provide the name of the Institutional Animal Care and Use Committee (IACUC) or other relevant ethics board that reviewed the study protocol, and indicate whether they approved this research or granted a formal waiver of ethical approval
- Include an approval number if one was obtained
- If the study involved *non-human primates*, add *additional details* about animal welfare and steps taken to ameliorate suffering
- If anesthesia, euthanasia, or any kind of animal sacrifice is part of the study, include briefly which substances and/or methods were applied

**Field Research**

Include the following details if this study involves the collection of plant, animal, or other materials from a natural setting:

- Field permit number
- Name of the institution or relevant body that granted permission

**Data Availability**

Authors are required to make all data underlying the findings described fully available, without restriction, and from the time of publication. PLOS allows rare exceptions to address legal and ethical concerns. See the [PLOS Data Policy](#) and [FAQ](#) for detailed information.

No - some restrictions will apply

A Data Availability Statement describing where the data can be found is required at submission. Your answers to this question constitute the Data Availability Statement and **will be published in the article**, if accepted.

**Important:** Stating 'data available on request from the author' is not sufficient. If your data are only available upon request, select 'No' for the first question and explain your exceptional situation in the text box.

Do the authors confirm that all data underlying the findings described in their manuscript are fully available without restriction?

**Describe where the data may be found in full sentences. If you are copying our sample text, replace any instances of XXX with the appropriate details.**

- If the data are **held or will be held in a public repository**, include URLs, accession numbers or DOIs. If this information will only be available after acceptance, indicate this by ticking the box below. For example: *All XXX files are available from the XXX database (accession number(s) XXX, XXX).*
- If the data are all contained **within the manuscript and/or Supporting Information files**, enter the following: *All relevant data are within the manuscript and its Supporting Information files.*
- If neither of these applies but you are able to provide **details of access elsewhere**, with or without limitations, please do so. For example:

*Data cannot be shared publicly because of [XXX]. Data are available from the XXX Institutional Data Access / Ethics Committee (contact via XXX) for researchers who meet the criteria for access to confidential data.*

*The data underlying the results presented in the study are available from (include the name of the third party*

Data cannot be shared publicly because it pertains to individuals' health information. Data are available from the corresponding author for researchers who meet the criteria for access to confidential data.

*and contact information or URL).*

- This text is appropriate if the data are owned by a third party and authors do not have permission to share the data.

\* typeset

Additional data availability information:

1 **The Use of Complementary and Alternative Medicine among Hypertensive and Type 2**  
2 **Diabetic Patients in Western Jamaica: A Mixed Methods Study**

3 **Short title: CAM use for hypertension and type 2 diabetes mellitus**

4 Omolade Adeniyi, BS<sup>1</sup>; LaTimberly Washington, MS<sup>1</sup>; Sarah Franklin, BS<sup>1</sup>; Maung Aung, MD,  
5 MPH<sup>2</sup>; Soumya Niranjana, B Pharm., MS, Ph.D<sup>3</sup>; and Pauline E. Jolly, PhD, MPH<sup>1</sup>.

6 <sup>1</sup>Department of Epidemiology, School of Public Health, University of Alabama at Birmingham,  
7 Birmingham, Alabama, USA

8 <sup>2</sup>Epidemiology Unit, Western Regional Health Authority, Ministry of Health, Montego Bay, St.  
9 James, Jamaica

10 <sup>3</sup>Health Services Administration, School of Health Professions, University of Alabama at  
11 Birmingham, Alabama, USA

12 **Corresponding Author:**

13 Pauline E. Jolly; PhD, MPH

14 Professor

15 Department of Epidemiology

16 University of Alabama at Birmingham, School of Public Health

17 1665 University Boulevard, Birmingham, AL 35294-0022

18 Telephone: (205)-974-1823

19 Email: jollyp@uab.edu

20 **Abstract**

21 **Background:** Hypertension and type 2 diabetes mellitus are among the top ten causes of  
22 death among Jamaicans. The simultaneous use of alternative treatments and prescription  
23 medications for these conditions is common in Jamaica. **Objectives:** To identify beliefs and  
24 practices associated with the use of alternative treatments for hypertension and type 2 diabetes  
25 mellitus among patients. **Methods:**  A mixed methods study including an investigator-  
26 administered survey and focus group discussion sessions was conducted among patients  $\geq 18$   
27 years. The quantitative data was summarized and a thematic analysis procedure was conducted to  
28 analyze the qualitative data using NVivo. **Results:** Participants in the study were mostly women  
29 (75%) and most (87-90%) were on prescription medication for their condition. Of survey  
30 participants, 69% reported taking their medication as prescribed and 70% felt their prescription  
31 medicine was controlling their condition. Almost all (98%) reported using CAM, mainly herbal  
32 medications, and most (73-80%) felt that herbal medicines controlled their conditions; one-third  
33 believed that CAM is the most effective form of treatment and should always be used instead of  
34 prescription medication. However, most participants (85.1%) did not believe that prescription  
35 medication and CAM should be used simultaneously. Only 10% -24% of participants reported  
36 discussing CAM with their healthcare providers. Four themes emerged from the focus group  
37 sessions: 1) Simultaneous use of herbal and prescription medicine was perceived to be harmful,  
38 2) Patients did not divulge their use of herbal medicine to healthcare providers, 3) Alternative  
39 medicines were perceived to be highly effective, and 4) Religiosity and family elders played key  
40 roles in herbal use. **Conclusions:** This study showed that CAM, mainly herbal medicines, is  
41 widely used by patients who have strong beliefs that alternative treatments control their disease.



- 42 Training healthcare providers in CAM so that they can appropriately advise patients will
- 43 improve managements of chronic diseases among patients.

44 **Introduction**

45           The World Health Organization (WHO) reports that Type 2 Diabetes Mellitus (T2DM)  
46 and Hypertension (HTN) are two of the top ten causes of death among the Jamaican population  
47 [1]. Worldwide, the prevalence of diabetes has increased significantly since 1995 with over 48  
48 million people currently living with the disease. In Jamaica, it is projected that there will be an  
49 additional 33,000 people diagnosed with diabetes by the year 2030, with the current prevalence  
50 being at over 200,000 cases [2]. Jamaica’s population is approximately 2.7 million people, and  
51 non-communicable diseases (NCDs) have increased the economic burden due to the working  
52 population being the most affected and decreasing productivity [3].

53           Complementary and alternative medicine (CAM) has been used for centuries across the  
54 globe and consist of a diverse subset of therapies such as dietary supplements, botanicals,  
55 traditional Chinese medicine, acupuncture, mind-body medicine, and therapeutic massage  
56 [1,4,5]. According to the World Health Organization, roughly 80% of the world’s population use  
57 at least one form of CAM [6]. Reasons for CAM use vary by country and level of conventional  
58 healthcare available among the populations [6]. In countries where many individuals lack access  
59 to healthcare resources, and with increasing healthcare costs globally, CAM can often provide a  
60 more affordable and accessible alternative to conventional medical care [5]. In high income  
61 countries such as the United States of America, CAM use deviates from traditional practices and  
62 has been adopted from other countries where CAM consumption is within the dominant structure  
63 of healthcare. Types of CAM used in the Caribbean are often methods that have been practiced  
64 for generations and have deep cultural and/or religious roots [7]. A survey conducted in Jamaica  
65 in 2000 examining use of herbal remedies found that 100% of the participants used herbs, this

66 study examined Jamaicans from both rural and urban settings and of varying socioeconomic  
67 groups [8].

68 Other research suggests that there are significant associations with herbal use and  
69 education, gender, religion, and health insurance status among Jamaicans [9]. It has also been  
70 shown that the use of herbal medicines in conjunction with prescription medications is common.  
71 Jamaicans are likely to use herbal medicine not only for the treatment of HTN and T2DM but  
72 also for illnesses such as the common cold, headache, or diarrhea [9]. In Jamaica and the United  
73 States, cases of HTN and T2DM are linked to lifestyle practices; however, it is evident that  
74 adherence to prescription medications for chronic diseases is lower for those living in the  
75 Caribbean compared to the United States [10].

76 Although use of CAM has been prevalent worldwide for many years and considered  
77 effective for many illnesses, there has been a shortage of experimental studies to determine the  
78 true effectiveness of CAM as a plausible treatment for illnesses [11]. One review on drug-herbal  
79 interactions discussed seven of the most common herbal medicines used, which included St.  
80 Johns Worts (*Hypericum perforatum*), Saw Palmetto (*Serenoa repens*), and Ginkgo Biloba [12].  
81 Each of these herbs have been tested in controlled trials and have been shown to produce both  
82 adverse and beneficial effects. For example, a series of prescription medications used to treat  
83 chronic and acute conditions were tested with Saw Palmetto, and when paired with Warfarin the  
84 anticoagulant effect of Saw Palmetto is increased, but when taken with Metronidazole nausea  
85 and vomiting were observed [12]. Saw Palmetto taken alone did not cause serious adverse health  
86 effects other than headaches and nausea. Preclinical studies aimed to focus on renal and  
87 pancreatic function showed positive therapeutic effects after the administration of low-dose  
88 Moringa seeds [13]. Furthermore, histological microscopy was also used to confirm the positive

89 effects. However, this may differ in the human body where Moringa is ingested in uncontrolled  
90 amounts [13].

91 This mixed-methods research study was conducted to provide a deeper understanding of  
92 CAM use for HTN and T2DM by Jamaicans patients. With the expected increase in T2DM and  
93 HTN, understanding the beliefs and use of alternative treatments is essential for appropriate  
94 guidance of patients for proper management of these chronic diseases. We investigated CAM  
95 use, beliefs regarding the effectiveness of prescription medication and CAM and discussion of  
96 CAM with healthcare providers (HCPs) by patients. The qualitative portion of the study provided  
97 an opportunity for open narratives and richer context within our target population.

## 98 **Material and Methods**

### 99 *Study design, site, and study population*

100 A cross-sectional mixed-methods study was conducted among patients  $\geq 18$  years of age  
101 attending clinics for HTN and T2DM in the four parishes of western Jamaica (St. James,  
102 Westmoreland, Hanover, and Trelawny) under the Western Regional Health Authority (WRHA).  
103 Clinic nurses informed patients of the study when they came in for an appointment. Patients who  
104 indicated interest to participate in the study were then introduced to the research team. The  
105 potential participants were told about the study by the research team in private rooms in the  
106 clinic. Signed informed consent was obtained after the patients were given the opportunity to ask  
107 questions and were satisfied that they wanted to participate. Patients were asked if they would be  
108 able to participate in a Focus Group Discussion (FGD) session that would be arranged for a later  
109 date and contact information was taken for those who said they could. Participants in FGD  
110 sessions were not allowed to complete the questionnaires.

### 111 *Inclusion and exclusion criteria*

112 Participants in this study were adults  $\geq 18$  years of age who had been diagnosed with  
113 HTN and/or T2DM and were attending health clinics located in one of the four parishes under  
114 the WRHA. Those who did not meet these inclusion criteria were excluded.

#### 115 *Quantitative and qualitative data collection*

##### 116 *Quantitative*

117 Quantitative data on sociodemographic factors (age, education, employment status,  
118 income, and residence), CAM use, beliefs on effectiveness of prescription medication and CAM,  
119 and communication with HCPs on CAM use were collected using an investigator-administered  
120 questionnaire. Questionnaires took approximately 30-45 minutes to complete.

##### 121 *Qualitative*

122 Five FGD sessions (two in St. James and one in each of the other three parishes) were  
123 conducted with a total of 25 participants (approximately five in each group). FGD sessions were  
124 conducted in vacant conference and exam rooms at the clinics. Each FGD session lasted  
125 approximately 75 minutes and was comprised of male and female participants who had HTN,  
126 T2DM, or both. Demographic information was obtained for each participant and FGD questions  
127 were tailored to generate discussion on when participants chose to use CAM, their perception of  
128 the effectiveness of CAM versus prescription medication, whether participants used prescription  
129 medication and CAM concurrently, and communication with their HCPs regarding their  
130 medicinal practices.

##### 131 *Ethical approval*

132 The study was approved by the Institutional Review Board at the University of Alabama  
133 at Birmingham and by the Western Regional Health Authority; protocol approval #IRB-  
134 170310006.

135 **Data Analysis**

136 *Quantitative data*

137 The questionnaire data were entered into excel and tables showing numbers and  
138 percentages are presented and discussed.

139 *Qualitative data*

140 Transcripts were reviewed by three independent coders (S.J.N.; L.W.; O.A.) and coded  
141 using QSR International's NVivo 11.4.3 software using line-by-line coding of all responses to  
142 the above- mentioned questions, followed by focused coding for directed codes. We utilized  
143 constant comparative method to generate themes from the transcribed data [14]. Trustworthiness  
144 was achieved through data triangulation and peer debriefing [15]. Themes are presented in a  
145 manner that convey understanding of CAM and prescription medication use.

146 **Results**

147 **Quantitative results**

148 *Demographic characteristics of questionnaire participants*

149 Sixty patients, aged 35-82 years, completed the questionnaire; 37 (61.7%) had HTN only,  
150 10 (16.7%) had T2DM only, and 13 (21.7%) had both diseases (Table 1). Most participants were  
151 female, had a secondary education, and had no income or were earning <J\$24,000 a month (USD  
152 1 = JD 122; Table 1).

**Table 1. Demographic characteristics of survey participants****N=60**

|                                   | <i>N</i> | <i>%</i> |
|-----------------------------------|----------|----------|
| <b>Sex</b>                        |          |          |
| <b>Male</b>                       | 15       | 25.0     |
| <b>Female</b>                     | 45       | 75.0     |
| <b>Age</b>                        |          |          |
| <b>35-49</b>                      | 12       | 20.0     |
| <b>50-64</b>                      | 28       | 46.7     |
| <b>65-79</b>                      | 18       | 30.0     |
| <b>≥80</b>                        | 2        | 3.3      |
| <b>Marital Status</b>             |          |          |
| <b>Single</b>                     | 29       | 48.3     |
| <b>Married</b>                    | 25       | 41.7     |
| <b>Divorced/separated/widowed</b> | 6        | 10.0     |
| <b>Education</b>                  |          |          |
| <b>No education</b>               | 4        | 6.7      |
| <b>Some/completed primary</b>     | 20       | 33.3     |
| <b>Some/completed secondary</b>   | 33       | 55.0     |
| <b>College/University</b>         | 3        | 5.0      |
| <b>Parish</b>                     |          |          |
| <b>St. James</b>                  | 12       | 20.0     |
| <b>Westmoreland</b>               | 19       | 31.7     |
| <b>Trelawny</b>                   | 14       | 23.3     |
| <b>Hanover</b>                    | 15       | 25.0     |
| <b>Income*</b>                    |          |          |
| <b>No income</b>                  | 17       | 28.8     |
| <b>&lt;J\$24,000</b>              | 18       | 30.5     |
| <b>J\$24,000-J\$60,000</b>        | 16       | 27.1     |
| <b>&gt;J\$60,000</b>              | 8        | 13.6     |

\*1 person did not specify

153

154 *Practices and beliefs regarding prescription medication use for T2DM and HTN (Table 2)*

155 A majority of the participants had been diagnosed with T2DM or HTN for over 10 years

156 and all but one patient with HTN reported using CAM (Table 2). The most common CAM

157 method used was herbal medicine; this was followed in sequential order by exercise, spiritual

158 healing, relaxation techniques, and diet modifications. The top five herbs used for T2DM in  
 159 sequential order were Guinea Hen Weed (*Petiveria alliacea*), Moringa (*Moringa oleifera*),  
 160 Garlic (*Allium sativum*), Ginger (*Zingiber officinale*) and Tumeric (*Curcuma longa*). For HTN,  
 161 the top five herbs used in sequential order were Guinea Hen Weed (*Petiveria alliacea*), Garlic  
 162 (*Allium sativum*), Moringa (*Moringa oleifera*), Lime (*Citrus aurantiifolia*) and Ginger (*Zingiber*  
 163 *officinale*).

**Table 2. Practices regarding use of prescription medication for type 2 diabetes mellitus (T2DM) and hypertension (HTN) by survey participants**

|                                                                                       | T2DM |       | HTN |      |
|---------------------------------------------------------------------------------------|------|-------|-----|------|
|                                                                                       | N    | %     | N   | %    |
| <b>When were you diagnosed with T2DM/HTN?</b>                                         |      |       |     |      |
| Within the past year                                                                  | 0    | 0.0   | 2   | 5.4  |
| 2-5 years ago                                                                         | 2    | 20.0  | 11  | 29.7 |
| 5-10 years ago                                                                        | 1    | 10.0  | 6   | 16.2 |
| >10 years ago                                                                         | 7    | 70.0  | 18  | 48.6 |
| <b>Are you currently using any alternative treatments/home remedies T2DM or HTN?</b>  |      |       |     |      |
| Yes                                                                                   | 10   | 100.0 | 36  | 97.3 |
| No                                                                                    | 0    | 0.0   | 1   | 2.7  |
| <b>Are you currently on medication from the clinic or a doctor for your T2DM/HTN?</b> |      |       |     |      |
| Yes                                                                                   | 9    | 90.0  | 32  | 86.5 |
| No                                                                                    | 1    | 10.0  | 5   | 13.5 |
| <b>Do you have difficulty in picking up your T2DM/HTN medicine?</b>                   |      |       |     |      |
| Yes                                                                                   | 1    | 10.0  | 11  | 33.3 |
| No                                                                                    | 8    | 80.0  | 20  | 60.6 |
| Sometimes                                                                             | 1    | 10.0  | 2   | 6.1  |
| <b>Do you get your T2DM/HTN medication free of cost?</b>                              |      |       |     |      |
| Yes                                                                                   | 4    | 40.0  | 23  | 71.9 |
| No                                                                                    | 5    | 50.0  | 9   | 28.1 |



|                                                                                                   |          |             |           |             |
|---------------------------------------------------------------------------------------------------|----------|-------------|-----------|-------------|
| <b>Sometimes</b>                                                                                  | <b>1</b> | <b>10.0</b> |           |             |
| <b>How much do you pay for your T2DM/HTN medicine?</b>                                            |          |             |           |             |
| <b>≤J\$2000</b>                                                                                   | <b>2</b> | <b>25.0</b> | <b>5</b>  | <b>29.4</b> |
| <b>J\$2001-4999</b>                                                                               | <b>2</b> | <b>25.0</b> | <b>6</b>  | <b>35.3</b> |
| <b>≥J\$5000</b>                                                                                   | <b>4</b> | <b>50.0</b> | <b>6</b>  | <b>35.3</b> |
| <b>Do you always refill your T2DM/HTN medication on-time</b>                                      |          |             |           |             |
| <b>Yes</b>                                                                                        | <b>9</b> | <b>90.0</b> | <b>23</b> | <b>71.9</b> |
| <b>No</b>                                                                                         | <b>0</b> | <b>0.0</b>  | <b>6</b>  | <b>18.8</b> |
| <b>Sometimes</b>                                                                                  | <b>1</b> | <b>10.0</b> | <b>3</b>  | <b>9.4</b>  |
| <b>Do you always take your T2DM/HTN medicine(s) as prescribed?</b>                                |          |             |           |             |
| <b>Yes</b>                                                                                        | <b>6</b> | <b>60.0</b> | <b>22</b> | <b>68.8</b> |
| <b>No/sometimes</b>                                                                               | <b>4</b> | <b>40.0</b> | <b>10</b> | <b>31.3</b> |
| <b>Do you think that your medicine is controlling your T2DM/HTN?</b>                              |          |             |           |             |
| <b>Yes</b>                                                                                        | <b>7</b> | <b>70.0</b> | <b>22</b> | <b>70.9</b> |
| <b>No</b>                                                                                         | <b>2</b> | <b>20.0</b> | <b>3</b>  | <b>9.7</b>  |
| <b>Sometimes</b>                                                                                  | <b>1</b> | <b>10.0</b> | <b>6</b>  | <b>19.4</b> |
| <b>Do you experience any side effects from your T2DM/HTN medicine(s)?</b>                         |          |             |           |             |
| <b>Yes</b>                                                                                        | <b>4</b> | <b>40.0</b> | <b>15</b> | <b>46.9</b> |
| <b>No</b>                                                                                         | <b>6</b> | <b>60.0</b> | <b>17</b> | <b>53.1</b> |
| <b>If you get a normal blood pressure reading, do you stop taking your prescription medicine?</b> |          |             |           |             |
| <b>Yes</b>                                                                                        |          |             | <b>6</b>  | <b>18.8</b> |
| <b>No</b>                                                                                         |          |             | <b>26</b> | <b>81.3</b> |
| <b>Does a normal (120/80) blood pressure reading mean that:</b>                                   |          |             |           |             |
| <b>You are cured</b>                                                                              |          |             | <b>1</b>  | <b>2.7</b>  |
| <b>Your blood pressure is normal at the time, but you still have HTN</b>                          |          |             | <b>36</b> | <b>97.3</b> |

164

165

166

167

168

Most participants (90% with T2DM and 87% with HTN) were on prescription medication for their condition and most received their medication from a pharmacy at a health center or a private pharmacy (Table 2). The main difficulties participants reported experiencing in picking up their prescriptions were financial difficulty, issues with their government-issued

169 insurance card, the pharmacy being out of medication, transportation issues, and need for  
170 someone to pick up the medication. Forty percent of diabetic patients and 72% of hypertensive  
171 patients reported getting their medication free of cost. Most participants reported filling their  
172 prescriptions on time; cost and lack of time were the main reasons given for not filling  
173 prescriptions on time. Sixty percent of patients with T2DM and 69% with HTN reported taking  
174 their medication as prescribed. Side effects, substitution/preference of alternate medication,  
175 forgetting to take, and stopping to see if the medication was working were the main reasons  
176 given by participants for not taking their medication as prescribed. Seventy percent of  
177 participants felt that their prescription medication was controlling their condition; most of those  
178 who felt the medication was not controlling their condition said that the medication was not  
179 effective enough. Forty percent of patients with T2DM and 47% with HTN said that they  
180 experienced side effects from the prescribed medication. The most common side effects reported  
181 were itchiness, stomach pains, and increased urination by patients with T2DM, and dizziness,  
182 headache, nausea/stomach ache, muscle pain and increased urination by patients with HTN. The  
183 majority of patients with HTN knew that a blood pressure reading of 120/80 did not mean that  
184 they were cured or that they should stop taking their prescription medication.

185 ***Knowledge, attitudes, and practices regarding CAM use for T2DM and HTN (Table 3)***

186 Most participants (80% with T2DM and 73% with HTN) felt that herbal medicines  
187 controlled their conditions. Seventy percent of diabetic patients and 42% of hypertensive patients  
188 reported that they do not take their prescription medication as prescribed when they take herbal  
189 medicines. The reasons given for not taking herbal and prescription medicines simultaneously  
190 were: did not want herbal medicine to interfere with prescription medicine, did not want to take  
191 too much medicine, preferred to use herbs, wanted to take less prescription medicine, wanted to

192 see if herbs were more effective, and did not want blood pressure to drop too low. All of the  
193 diabetic patients and 84% of hypertensive patients reported that they had received information  
194 about CAM, mainly that CAM can help to control T2DM and HTN, can benefit and are good for  
195 the body, and can kill cancer cells. A few patients reported that they heard that herbs were not  
196 good for the body and can worsen symptoms. Most participants reported that they received  
197 information from family, friends, and community members; only small percentages (10% with  
198 T2DM and 24% with HTN) reported discussing CAM with their HCPs. The main reasons  
199 patients gave for not discussing CAM with HCPs were, HCPs do not ask about CAM, they did  
200 not think of discussing CAM with HCPs, and HCPs do not approve of CAM. The top five  
201 reasons given by participants in choosing to use CAM were, CAM helps to control blood  
202 sugar/blood pressure, others recommended CAM, CAM is used when they do not have their  
203 prescription medication, they wanted to try CAM, and CAM is preferred over prescription  
204 medication. About one-quarter of participants reported taking CAM once or twice daily and  
205 when they are experiencing symptoms or are unable to afford prescription medication. Over 90%  
206 of participants reported no negative side effects of CAM, a few reported sleepiness, dizziness,  
207 loss of balance and sinus issues. Twenty percent of patients with T2DM and 27% with HTN felt  
208 that there were possible harmful effects of taking prescription and CAM simultaneously. Apart  
209 from general side effects such as stomachache and headache, a few patients felt that taking  
210 prescription and CAM simultaneously could lower blood sugar or blood pressure too much.

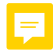

**Table 3. Knowledge, attitudes, and practices regarding CAM use for type 2 diabetes mellitus (T2DM) and hypertension (HTN)**

|                                                                                                                 | T2DM |       | HTN |      |
|-----------------------------------------------------------------------------------------------------------------|------|-------|-----|------|
|                                                                                                                 | N    | %     | N   | %    |
| <b>Do you think herbal medicines control your T2DM/HTN?</b>                                                     |      |       |     |      |
| Yes                                                                                                             | 8    | 80.0  | 27  | 73.0 |
| No                                                                                                              | 0    | 0.0   | 3   | 8.1  |
| Sometimes                                                                                                       | 2    | 20.0  | 7   | 18.9 |
| <b>When you use herbal medicine, do you still take your prescription medication as prescribed?</b>              |      |       |     |      |
| Yes                                                                                                             | 7    | 70.0  | 19  | 57.6 |
| No                                                                                                              | 3    | 30.0  | 14  | 42.4 |
| <b>Have you received information about alternative treatments?</b>                                              |      |       |     |      |
| Yes                                                                                                             | 10   | 100.0 | 31  | 83.8 |
| No                                                                                                              | 0    | 0.0   | 6   | 16.2 |
| <b>Where or from whom did you receive the information?</b>                                                      |      |       |     |      |
| Family/Friends/community members                                                                                | 6    | 60.0  | 26  | 63.4 |
| Internet/printed materials/ health book/radio or television doctors                                             | 3    | 30.0  | 9   | 22.0 |
| Healthcare provider                                                                                             | 1    | 10.0  | 5   | 12.2 |
| Own research                                                                                                    |      |       | 1   | 2.4  |
| <b>Have you discussed alternative treatments for T2DM/HTN with your healthcare provider?</b>                    |      |       |     |      |
| Yes                                                                                                             | 1    | 10.0  | 9   | 24.3 |
| No                                                                                                              | 9    | 90.0  | 28  | 75.7 |
| <b>Do you take alternate treatments when you cannot afford your prescribed medications?</b>                     |      |       |     |      |
| Yes                                                                                                             | 2    | 20.0  | 9   | 25.7 |
| No                                                                                                              | 7    | 70.0  | 25  | 71.4 |
| Sometimes                                                                                                       | 1    | 10.0  | 1   | 2.9  |
| <b>Do you experience any negative side effects when taking alternative medication?</b>                          |      |       |     |      |
| Yes                                                                                                             | 0    | 0.0   | 3   | 8.1  |
| No                                                                                                              | 10   | 100.0 | 34  | 91.9 |
| <b>Are there any possible harmful effects of using both herbal and prescription medicines at the same time?</b> |      |       |     |      |
| Yes                                                                                                             | 2    | 20.0  | 9   | 27.3 |
| No                                                                                                              | 8    | 80.0  | 20  | 60.6 |
| Unsure                                                                                                          |      |       | 4   | 12.1 |

211 **Participants' beliefs regarding the use of prescription and CAM (Table 4)**

212 The responses from a series of questions that evaluated participants' beliefs regarding the  
 213 use of prescription medication and CAM and using them simultaneously are presented in Table  
 214 4. Thirty-four percent of participants believed that CAM should always be used instead of  
 215 prescription medication and 40% believed that CAM is the most effective form of treatment for  
 216 their conditions. Seventy-nine percent indicated that they would communicate negative side  
 217 effects to their HCP before deciding to discontinue their prescription medications. A majority of  
 218 participants (85.1%) did not believe that it was okay to use prescription and CAM at the same  
 219 time and 77% believed that they should always discuss CAM use with their HCP.

**Table 4. Participants' perceptions/beliefs regarding use of alternative and prescription treatments**

|                                                                                                                                                                        | T2DM |      | HTN |      | Total |      |
|------------------------------------------------------------------------------------------------------------------------------------------------------------------------|------|------|-----|------|-------|------|
|                                                                                                                                                                        | N    | %    | N   | %    | N     | %    |
| <b>Alternative treatments should always be used instead of prescription medication</b>                                                                                 |      |      |     |      |       |      |
| Yes                                                                                                                                                                    | 4    | 40.0 | 12  | 32.4 | 16    | 34.0 |
| No                                                                                                                                                                     | 4    | 40.0 | 16  | 43.2 | 20    | 42.6 |
| Sometimes/unsure                                                                                                                                                       | 2    | 20.0 | 9   | 24.3 | 11    | 23.4 |
| <b>Alternative treatments are more effective at treating T2DM/HTN than prescription medication</b>                                                                     |      |      |     |      |       |      |
| Yes                                                                                                                                                                    | 5    | 50.0 | 14  | 37.8 | 19    | 40.4 |
| No                                                                                                                                                                     | 3    | 30.0 | 19  | 51.4 | 22    | 46.8 |
| Sometimes/unsure                                                                                                                                                       | 2    | 20.0 | 4   | 10.8 | 6     | 12.8 |
| <b>If you are experiencing unpleasant side effects of prescription medication, is it okay to stop taking the medicine without consulting your healthcare provider?</b> |      |      |     |      |       |      |
| Yes                                                                                                                                                                    | 1    | 10.0 | 9   | 24.3 | 10    | 21.3 |
| No                                                                                                                                                                     | 9    | 90.0 | 28  | 75.7 | 37    | 78.7 |
| <b>Do you think it is okay to use both prescription medication and alternative treatments at the same time to treat T2DM/HTN</b>                                       |      |      |     |      |       |      |
| Yes                                                                                                                                                                    | 3    | 30.0 | 4   | 10.8 | 7     | 14.9 |
| No                                                                                                                                                                     | 7    | 70.0 | 33  | 89.2 | 40    | 85.1 |

**Do you think that you should always discuss any alternative treatments for your condition with your healthcare provider**

|            |   |      |    |      |    |      |
|------------|---|------|----|------|----|------|
| <b>Yes</b> | 7 | 70.0 | 29 | 78.4 | 36 | 76.6 |
| <b>No</b>  | 3 | 30.0 | 8  | 21.6 | 11 | 23.4 |

220

221 **Qualitative results**

222 Four common themes emerged during FGD sessions (Table 5), which revealed the views  
 223 and beliefs of participants regarding CAM and prescription medication use for chronic disease  
 224 management.

---

**Table 5. Focus group themes**

---

- 1) Simultaneous use of herbal and prescription medicine was perceived to be harmful.**
  - 2) Patients did not divulge their use of herbal medicine to healthcare providers.**
  - 3) Alternative medicines were perceived to be highly effective**
  - 4) Religiosity and family elders played key roles in herbal use.**
- 

225 *Theme #1: Simultaneous use of herbal and prescription medicine was perceived to be harmful*

226 With regard to the simultaneous use of prescription medications with herbal medicines,  
 227 most respondents indicated that simultaneous use would cause adverse health effects and that  
 228 both should not be taken concomitantly. Some respondents expressed the consequences of  
 229 misusing these treatments, which include low blood pressure or low blood glucose and the  
 230 possibility of losing consciousness. One participant expressed her personal and interpersonal  
 231 experiences that summarized this theme:

232 *I went to the clinic and someone told me to take it [garlic] like pill but don't use it with*  
 233 *the medication because it will knock you out because it happened to me once [meaning*  
 234 *to the other person] (Participant 2, Trelawny, Female )*

235 *When I used them at the same time it hit me out and sent me to the hospital and made*  
236 *the pressure very low, so I don't use them together. - (Participant 2, Trelawny, Female)*

237 Relating a similar experience, one participant discussed her regimen for taking prescription  
238 medication and herbs.

239 *If I could get some herbs to take and see it helping the sugar and the pressure, I will*  
240 *leave the medication, but you cannot just come off it quick because it will physically*  
241 *hurt you. - (Participant 3, Trelawny, Female))*

242 *Theme #2: Patients did not divulge their use of herbal medicine to healthcare providers*

243 Most respondents conveyed that they did not feel it was necessary to communicate CAM  
244 use with their HCP. There was a fear that the HCP would disagree with the patients' decision to  
245 use CAM and advise against what was working for the patients. There were also indications that  
246 because herb use is an intricate part of the Caribbean culture, some herbs were used for other  
247 conditions, such as headaches or sinuses and without the intention of treating an individual's  
248 HTN or T2DM. Therefore, participants did not think to inform their HCP. One participant stated,

249 *I'm not discussing any herbs with the doctor because when you tell him about herbs he says*  
250 *'nonsense', 'foolishness' so I continue to drink the herb. I put the medication aside for a*  
251 *while, go on the herb, and then back to the medication. - (Participant 3, Trelawny, Female)*

252 On the other hand, the depth of the HCP-patient relationship was also an indicator of  
253 whether a respondent felt comfortable with disclosing information about herb use. There were  
254 several physicians working at the clinics that were not originally from Jamaica, which influenced  
255 the communication a patient received about herb use.

256 *My doctor is a Nigerian that supports both herbs and medication. I would love my*  
257 *Nigerian doctor to give me the herbs because I know he has an herb book and he knows*  
258 *which ones are best so I can get a list. - (Participant 4, Trelawny, Female)*

259 *Theme #3: Alternative medicines were perceived to be highly effective.*

260 Most of our participants perceived CAM to be more effective than prescription  
261 medications due to the known possible side effects of prescription medication. They also  
262 believed that some prescription medication alleviated the chronic disease but caused other  
263 complications.

264 *Yes, I believe the herb is coming from the spiritual background the medication the*  
265 *doctor gives is not as effective. I discovered that even the medication slows down your*  
266 *sex organ and the herb uplifts it. - (Participant 23, St. James, Male)*

267 *I think so because a lot of the chemical treatment ends up damaging the body so I think*  
268 *more research should be done in the herbal area, a lot of doctors don't support it because*  
269 *they won't be getting money. - (Participant 5, St. James, Male)*

270 One participant conveyed that although she was in favor of CAM, her prescription  
271 medication was equally as effective and provided her with rapid results. When the group was  
272 asked if they still take their prescription medication as prescribed when using herbal medications,  
273 one participant answered:

274 *I live on my medication but I just take it (herb) for tea so I still take my [prescription]*  
275 *medication. - (Participant 16, Westmoreland, Female)*

276 *Theme #4: Religiosity and family elders played key roles in herbal use.*



277           When participants were asked about how they were informed of CAM, most responded  
278 that their family and community elders influenced them and that they grew up witnessing people  
279 in their communities sharing CAM methods to treat a wide variety of illnesses. Also, many  
280 expressed listening to radio doctors explain CAM methods for certain conditions.

281           *I learned a lot from my grandmother even when I had my children, she told me what*  
282           *type of herbs to give them. - (Participant 11, Hanover, Female)*

283           *I heard from my parents my mother and father they said that the garlic is good for*  
284           *pressure. – (Participant 14, Hanover, Male)*

285           *I hear plenty people talk about the garlic plus a doctor I hear over the radio talks about*  
286           *garlic and says it is good. - (Participant 1, Trelawny, Female)*

287           Within each FGD session, participants expressed that religion played a role in their  
288 comfort with using CAM for chronic diseases and other illnesses. For instance, two participants  
289 responded:

290           *God put herbs on the earth to heal people, but they are not using it because when I take*  
291           *the pill they give me a lot of side effects. - (Participant 3, Trelawny, Female)*

292           *Herbal comes from my religion the Seventh-day Adventist, the prophetess, Ellen, tells us*  
293           *that herbs are good for the body - (Participant 23, Hanover, Male)*

## 294 **Discussion**

295           Results from the quantitative and qualitative analysis mirror each other. Responses from  
296 our focus groups provided a better understanding of the societal beliefs that individuals have  
297 acquired and shed light on why some individuals prefer CAM methods, particularly herbal  
298 remedies, to prescription medication.

299           The survey revealed that a majority of our participants revealed that they chose to use  
300 CAM because prescription medications had side effects that included headaches, decreased  
301 energy, and stomachaches. This theme was noted in our FGD sessions where our participants  
302 stated that CAM's reduced or nonexistent side effects were preferred over side effects from  
303 prescription medicines.

304           Participants also believed that prescription medications were made from herbs; therefore,  
305 they believed that herbal remedies are the purest form of medication and best for the body.  
306 Studies conducted to understand the perceived risks and benefits of herbal use by participants,  
307 report that herbal use is not perceived as being safer than conventional medicines but are viewed  
308 as being more "natural" [16].

309           The majority of participants stated that they do not use herbal medicines and prescription  
310 medication together in fear that combined use will decrease their blood pressure or blood glucose  
311 to dangerous levels. Among hypertensive patients, garlic and Moringa teas and eating whole or  
312 chopped garlic cloves were most popular. Studies suggest that conventional and herbal drug  
313 interactions do cause adverse reactions [12]. In the United States, a study revealed that seven of  
314 the most common CAMs used, including St. Johns Wort, Saw Palmetto, and Ginkgo Biloba, can  
315 interfere with the pharmacokinetics and pharmacodynamics of prescription drugs and pose  
316 unknown negative effects in the body [12]. A series of conventional medications used for  
317 chronic diseases was tested with Saw Palmetto and the results included positive and adverse  
318 reactions [12]. For instance, when Saw Palmetto is paired with Warfarin, the anticoagulant effect  
319 is increased, but if taken with Ibuprofen, serious bleeding is evident [12]. Saw Palmetto taken  
320 alone has not proven to cause serious adverse health effects aside from headache and nausea.  
321 Preclinical studies in rats on the efficacy of low-dose Moringa seeds showed therapeutic effects

322 in improving renal and pancreatic function [13]. Although these were positive results, this may  
323 differ in the human body where Moringa may be ingested in uncontrolled amounts.

324 Consistent with other studies, our study participants also believed it is important to  
325 communicate their use of CAM with their HCPs, although they chose not to disclose CAM use  
326 due to fear of disapproval [8]. A study reported that HCPs do not have adequate knowledge of  
327 CAM use, and thus are not able to give medical advice to patients who use CAM [17]. This may  
328 in part explain HCPs' reluctance in discussing CAM use with patients. Moreover, literature also  
329 suggests that HCPs want to understand the use of CAM and the case-based research behind its  
330 use [18]. Therefore, changes to the curriculum for medical, nursing, dietetic and pharmacy  
331 students, residents, and fellows to include CAM methods may facilitate increased knowledge of  
332 the beneficial and harmful effects of CAM. A finding of interest was that nationality and cultural  
333 background of HCPs may influence how information on CAM methods is translated to the  
334 public. A participant discussed her interactions with a HCP of African nationality who she is  
335 convinced has good knowledge of herbs. Studies conducted in Trinidad and Tobago and Jamaica  
336 found a higher level of acceptance of CAM use among Trinidadian HCPs in comparison to those  
337 from Jamaica; however, HCPs in both countries seemed to lack proper knowledge about herb-  
338 drug use interactions which could be contributing to the lack of communication with patients [8].

339 As previously mentioned, patients were not able to give specific examples of adverse  
340 effects associated with simultaneous use of herbal and prescription drugs. Previous research  
341 suggests that there should be increased efforts aimed to increase information on the possible  
342 harmful effects of concurrent use with prescription drugs [6].

343 Religion was an important factor in influencing herbal use in this study. Therefore, clergy  
344 members could be used in conjunction with HCPs to relay pertinent information regarding CAM  
345 use. Recent studies show that clergy members are key components in health promotion [19].

#### 346 *Limitations*

347 This study has limitations that should be considered in interpreting the results. First, the  
348 sample size is small and the convenience sampling method used is prone to inherent bias in   
349 representation. As such, the sample may not be representative of the study population and the results may  
350 not be generalizable to the population studied. Some patients declined to participate in the study due  
351 to lack of trust in providing personal health information to the research staff; they feared that the  
352 personal information provided could be used against them. Secondly, the study sample  
353 represents only patients who attended the chronic disease clinics in the WRHA; therefore, the  
354 results may not be generalizable to patients attending other clinics in the region or in other  
355 regions of Jamaica that were not sampled. Additionally, the data were self-reported and as a  
356 result might be subject to social desirability bias. Conducting study interviews and FGD sessions  
357 within churches or faith-based institutions might have yielded increased numbers of participants  
358 in FGD sessions since CAM use is rooted in religious or community customs; this might have  
359 allowed us to reach locations where conversations on CAM use often take place.

#### 360 **Conclusions**

361 This study shows that CAM methods such as use of herbs, prayer, diet, and exercise to  
362 treat chronic diseases are a part of daily life for many Jamaicans. The findings from the  
363 questionnaires and the themes from the FGD sessions provided new information and insight into  
364 the perceptions of respondents regarding their propensity towards CAM use. Patients believed  
365 based on their own personal experiences, and those of community/church members, that

366 alternative treatments are effective with far less adverse effects as compared to prescription  
367 medicine. Patients did not discuss their use of CAM with HCPs since they felt that most HCPs  
368 did not endorse the use of CAM. These findings help to reveal the importance of HCP-initiated  
369 conversations about patient use of CAM. Many patients are aware that there could be adverse  
370 reactions to the concurrent use of prescription and herbal treatments, but few were able to state  
371 these adverse effects specifically. While patients are not able to articulate possible harm in  
372 simultaneous use of prescription and alternative treatments, they have developed their own  
373 algorithms of use. Thorough explanations of these effects from an HCP is essential. Thus, the  
374 findings from this study highlight the importance of including education on CAM including  
375 herbal medication in the curricula of HCPs as this knowledge will allow HCPs to be more  
376 confident in advising patients on the use of CAM. This will ultimately lead to better treatment  
377 plans and management of these chronic diseases.

### 378 **Acknowledgments**

379 We thank the nurses in the clinics who facilitated the study and the patients who  
380 participated.

381

382  
383  
384  
385  
386  
387  
388  
389  
390  
391  
392  
393  
394  
395  
396  
397  
398  
399  
400  
401  
402  
403

## References

1. World Health Organization. Jamaica. 2018 [Cited 7 July 2020]. [Internet]. Available from: [www.who.int/nmh/countries/jam\\_en.pdf?ua=1](http://www.who.int/nmh/countries/jam_en.pdf?ua=1).
2. Wild S, Roglic G, Green A, Sicree R, King H. Global Prevalence of Diabetes: Estimates for the year 2000 and projections for 2030. *Diabetes Care*. 2004 May;27(5):1047-53.
3. Ferguson TS, Tulloch-Reid MK, Wilks RJ. The epidemiology of diabetes mellitus in Jamaica and the Caribbean: a historical review. *West Indian Med J*. 2010 Jun;59(3):259-64.
4. World Health Organization. Traditional, Complementary and Integrative Medicine. [Cited 7 July 2020]. In: World Health Organization [Internet]. Available from: [https://www.who.int/health-topics/traditional-complementary-and-integrative-medicine#tab=tab\\_1](https://www.who.int/health-topics/traditional-complementary-and-integrative-medicine#tab=tab_1).
5. World Health Organization. WHO Traditional Medicine Strategy 2014-2023. 2013 [cited 2020 July 7]. Available from: <https://apps.who.int/iris/handle/10665/92455>.
6. Clement YN, Williams AF, Khan K, Bernard T, Bhola S, Fortuné M, et al. A gap between acceptance and knowledge of herbal remedies by physicians: the need for educational intervention. *BMC Complement Altern Med*. 2005 Nov 18;5:20.
7. Bahall M, Edwards M. Perceptions of complementary and alternative medicine among cardiac patients in South Trinidad: a qualitative study. *BMC Complement Altern Med*. 2015;15:99.
8. Delgoda R, Younger N, Barrett C, Braithwaite J, Davis D. The Prevalence of Herbs Use in Conjunction with Conventional Medicines in Jamaica. *Complement Ther Med*. 2010 Feb;18(1):13-20.

- 404 9. Picking D, Younger N, Mitchell S, Delgoda R. The prevalence of herbal medicine home use  
405 and concomitant use with pharmaceutical medicines in Jamaica. *J Ethnopharmacol.* 2011 Sep  
406 1;137(1):305-11.
- 407 10. Boume PA, McGrowder DA. Health status of patients with self-reported chronic diseases in  
408 Jamaica. *N Am J Med Sci.* 2009 Dec;1(7):356-64.
- 409 11. National Center for Complementary and Integrative Health. Complementary, Alternative, or  
410 Integrative Health: What's In a Name?" 2018 July [8 July 2020]. [Internet]. National  
411 Institutes of Health. Available from: [https://www.nccih.nih.gov/health/complementary-](https://www.nccih.nih.gov/health/complementary-alternative-or-integrative-health-whats-in-a-name)  
412 [alternative-or-integrative-health-whats-in-a-name](https://www.nccih.nih.gov/health/complementary-alternative-or-integrative-health-whats-in-a-name).
- 413 12. Bressler R. Herb-drug interactions. Interactions between saw palmetto and prescription  
414 medications. *Geriatrics.* 2005 Nov;60(11):32, 34.
- 415 13. Al-Malki AL, El Rabey HA. The Antidiabetic Effect of Low Doses of *Moringa oleifera* Lam.  
416 Seeds on Streptozotocin Induced Diabetes and Diabetic Nephropathy in Male Rats. *BioMed*  
417 *Res Int.* 2015 Jan; 2015.
- 418 14. Creswell JW, Clark VLP. Designing and conducting mixed methods research. 3<sup>rd</sup> edition.  
419 SAGE Publications, Inc. 2018.
- 420 15. Shenton AK. Strategies for ensuring trustworthiness in qualitative research projects.  
421 *Education for information.* 2004;22(2):63-75.
- 422 16. Lynch N, Berry D. Differences in perceived risks and benefits of herbal, over-the-counter  
423 conventional, and prescribed conventional, medicines, and the implications of this for the  
424 safe and effective use of herbal products. *Complement Ther Med.* 2007 Jun;15(2):84-91.
- 425 17. Milden SP, Stokols D. Physicians' attitudes and practices regarding complementary and  
426 alternative medicine. *Behav Med.* 2004 Summer;30(2):73-82.

- 427 18. Patel SJ, Kemper KJ, Kitzmiller JP. Physician perspectives on education, training, and  
428 implementation of complementary and alternative medicine. *Adv Med Educ Pract.* 2017 Jul  
429 25;8:499-503.
- 430 19. Bopp M, Baruth M, Peterson JA, Webb BL. Leading their flocks to health? Clergy health and  
431 the role of clergy in faith-based health promotion interventions. *Fam Community Health.*  
432 2013 Jul-Sep;36(3):182-92.



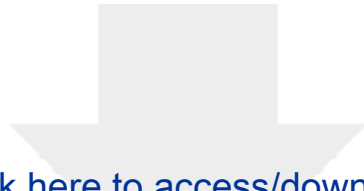

Click here to access/download  
**Supporting Information**  
Financial Disclosure Statement.docx

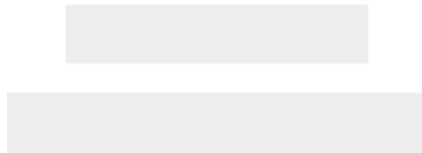

Supplement: pone.0245163.s004.pdf [file pone.0245163.s004.pdf]
