# Supplementary material for: The use of complementary and alternative medicine among hypertensive and type 2 diabetic patients in Western Jamaica: A mixed methods study
Source: PubMed Central journal article supplement (PMC7870151; doi:10.1371/journal.pone.0245163), 2021-02-08
Supplement: pone.0245163.s002.pdf [file pone.0245163.s002.pdf]

**Title: Common alternative therapies used by persons with Chronic Non-Communicable Diseases (Hypertension and Type 2 Diabetes) in Western Jamaica**

**Interview for Diabetes**

**ID:** \_\_\_\_\_

**Date:** \_\_\_\_\_

1. Are you currently using any alternative treatments/home remedies for your diabetes?

Yes                      No

If yes, which alternative treatment method do you currently use? **Mark all that apply**

- |                         |                             |
|-------------------------|-----------------------------|
| Herbal medicine         | Exercise                    |
| Nutritional supplements | Spiritual healing           |
| Diet modifications      | Relaxation techniques       |
| Manual techniques       | Other, please specify _____ |

2. If you are not currently using an alternative treatment, have you used alternative treatments previously?

Yes                      No

If yes, why did you discontinue use of alternative treatments?

**Demographic Information:**

3. Parish:    Hanover              St. James              Westmoreland              Trelawny

4. District: \_\_\_\_\_

5. Sex:              Male                      Female

6. Date of Birth: \_\_\_/\_\_\_/\_\_\_\_                      Age: \_\_\_\_\_

7. What is the highest level of education you have completed?

- |                   |                                          |
|-------------------|------------------------------------------|
| Some Primary      | Completed Secondary Technical/Vocational |
| Completed Primary | College/University                       |
| Some Secondary    | No education                             |

8. Religious Affiliation:

- |            |                 |
|------------|-----------------|
| Catholic   | Jehovah Witness |
| Protestant | Rastafarian     |
| Muslim     | Adventist       |

Other, please specify: \_\_\_\_\_

9. What is your marital status?

- |                     |                   |
|---------------------|-------------------|
| Single              | Widowed/ Divorced |
| Married/ Common Law |                   |

10. What is your living arrangement?

- |                                |
|--------------------------------|
| House/Apartment/Condo you own  |
| House/Apartment/Condo you rent |
| Stay with family/friend        |
| Other, please specify: _____   |

11. What is your occupation?

None

Professional (e.g. teacher, policeman, doctor, .....)

Skilled (e.g. plumber, mechanic, electrician, hairdresser, lab technicians .....)

Clerical (e.g. secretary,

Unskilled (e.g. sanitation/janitorial, ward assistants, porters.....)

Other, please specify \_\_\_\_\_

12. What is your individual monthly income?

No income (being supported by the family)

Less than J\$24,800 (min. wage J\$6,200 weekly)

J\$24,801-J\$60,000

J\$60,001-J\$120,000

J\$120,001—J\$200,000

11a. Other Income: J\$ \_\_\_\_\_

13. How many people live in the same house with you?

Number of adults ( $\geq 18$  years) including you: \_\_\_\_\_

Number of children (under 18 years): \_\_\_\_\_

Number of children in school: \_\_\_\_\_

## Type 2 Diabetes Mellitus Questions

14. When were you diagnosed with diabetes?

Within the past year

2-5 years ago

6-10 years ago

>10 years ago

15. Are you currently on medication from the clinic or a doctor for your diabetes?

Yes

No

16. Where do you receive medications for your diabetes?

Health center

Pharmacy

Hospital

17. Do you have difficulty in picking up your diabetes medicine?

Yes

No

If Yes, what difficulty do you experience?

18. Do you get your diabetes medication free of cost or do you have to pay? If you pay, how much?

19. Do you always refill your diabetes medication on-time (i.e. before you run out)?

Yes

No

20. If no, why don't you always fill your diabetes medicine on time?

21. Do you always take your diabetes medicine(s) as prescribed?

Yes                      No

If no, why not?

22. Do you think that your diabetes medicine is controlling your diabetes?

Yes                      No

If no, why do you think so?

23. Do you experience any side effects from your diabetes medicine(s)?

Yes                      No

If yes, what side effects do you experience?

### Alternative Treatment Use and Knowledge

24. Name the herbal medicines that you take for diabetes and how often you take them.

1. \_\_\_\_\_

|                 |                 |                        |                  |
|-----------------|-----------------|------------------------|------------------|
| 1-3 days a week | 4-6 days a week | 7 days a week          | Every other week |
| Once a month    | Every 2 months  | Every 3 months or less |                  |

2. \_\_\_\_\_

|                 |                 |                        |                  |
|-----------------|-----------------|------------------------|------------------|
| 1-3 days a week | 4-6 days a week | 7 days a week          | Every other week |
| Once a month    | Every 2 months  | Every 3 months or less |                  |

3. \_\_\_\_\_

|                 |                 |                        |                  |
|-----------------|-----------------|------------------------|------------------|
| 1-3 days a week | 4-6 days a week | 7 days a week          | Every other week |
| Once a month    | Every 2 months  | Every 3 months or less |                  |

4. \_\_\_\_\_

|                 |                 |                        |                  |
|-----------------|-----------------|------------------------|------------------|
| 1-3 days a week | 4-6 days a week | 7 days a week          | Every other week |
| Once a month    | Every 2 months  | Every 3 months or less |                  |

5. \_\_\_\_\_

|                 |                 |                        |                  |
|-----------------|-----------------|------------------------|------------------|
| 1-3 days a week | 4-6 days a week | 7 days a week          | Every other week |
| Once a month    | Every 2 months  | Every 3 months or less |                  |

25. Do you think these herbal medicines control your diabetes?

If yes, why do you think so?

26. When you use herbal medicine, do you still take your prescription medication as prescribed?

Yes                      No

If no, what do you do?

27. Have you received information about alternative treatments?

Yes                      No

If Yes, what have you heard about alternative treatments for diabetes?

Where or from whom did you receive the information?

28. Have you discussed alternative treatments for diabetes with your healthcare provider?

Yes                      No

If no, why not?

29. Why do you choose to use alternative medication to treat your diabetes?

30. When do you take alternative medications?

Do you take them when you cannot afford your prescribed medications?

31. Do you experience any negative side effects when taking alternative medication?

If so, what do you experience?

32. Are there any possible harmful effects of using both herbal and prescription medicines at the same time?

If so, what are possible harmful effects?

## **Knowledge Regarding Alternative Treatments**

Do you believe:

33. Alternative treatments should **always** be used instead of prescription medication?

Yes                      No

34. Alternative treatments are **more** effective at treating diabetes than prescription medication?

Yes                      No

35. If you are experiencing unpleasant side effects of prescription medication, is it okay to stop taking the medicine without consulting your healthcare provider?

Yes                      No

36. Do you think it is okay to use both prescription medication and alternative treatments at the same time to treat diabetes?

Yes                      No

37. Do you think that you should always discuss any alternative treatments for your condition with your healthcare provider?

Yes                      No

Why or why not?

## **Patient Clinical Data**

1. Date diagnosed with Type 2 Diabetes (mm/dd/yyyy) : \_\_\_MM\_\_\_DD\_\_\_YYYY
  
2. Glucose and A1C readings  
Date: \_\_\_MM\_\_\_DD\_\_\_YYYY                      Reading: \_\_\_\_\_  
Date: \_\_\_MM\_\_\_DD\_\_\_YYYY                      Reading: \_\_\_\_\_  
Date: \_\_\_MM\_\_\_DD\_\_\_YYYY                      Reading: \_\_\_\_\_
  
3. Weight: \_\_\_\_\_                      Date weighed: \_\_\_MM\_\_\_DD\_\_\_YYYY
4. Height: \_\_\_\_\_                      Date measured: \_\_\_MM\_\_\_DD\_\_\_YYYY

### **Interview for Hypertension**

38. Are you currently using any alternative treatments/home remedies for your hypertension/high blood pressure?  
Yes                      No  
If Yes, which alternative treatment method do you currently use?  
Herbal medicine                      Exercise  
Nutritional supplements                      Spiritual healing  
Diet modifications                      Relaxation techniques  
Manual techniques                      Other, please specify: \_\_\_\_\_
39. If you are not currently using an alternative treatment, have you used alternative treatments previously?  
Yes                      No  
If yes, why did you discontinue use of alternative treatments?
40. When were you diagnosed with high blood pressure?  
Within the past year  
2-5 years ago  
5-10 years ago  
>10 years ago
41. Are you currently on medication from the clinic or a doctor for your high blood pressure?  
Yes                      No
42. Where do you receive your medications for your High blood pressure?  
Health center  
Pharmacy  
Hospital
43. Do you have difficulty in picking up your blood pressure medicine?  
Yes                      No

If Yes, what difficulty do you experience?

44. Do you get your blood pressure medication free of cost or do you have to pay? If you pay, how much?

45. Do you always refill your high blood pressure medication on-time?

Yes                      No

46. If no, why don't you always fill your blood pressure medicine on time?

47. Do you take your blood pressure medicine(s) as prescribed?

Yes                      No

If no, why not?

48. Do you think that your blood pressure medicine is controlling your high blood pressure?

Yes                      No

If no, why do you think so?

49. If you get a normal blood pressure reading, do you stop taking your prescription medicine?

Yes                      No

50. Does a normal (120/80) blood pressure reading mean that:

You are cured

Your blood pressure is normal at the time but you still have high blood pressure

Other, please specify

51. Do you experience any side effects from your high blood pressure medicine(s)?

Yes                      No

If yes, what side effects do you experience?

### **Alternative Treatment Use and Knowledge**

52. Name the herbal medicines that you take for high blood pressure and how often you take them.

1. \_\_\_\_\_

|                 |                 |                        |                  |
|-----------------|-----------------|------------------------|------------------|
| 1-3 days a week | 4-6 days a week | 7 days a week          | Every other week |
| Once a month    | Every 2 months  | Every 3 months or less |                  |

2. \_\_\_\_\_

|                 |                 |                        |                  |
|-----------------|-----------------|------------------------|------------------|
| 1-3 days a week | 4-6 days a week | 7 days a week          | Every other week |
| Once a month    | Every 2 months  | Every 3 months or less |                  |

3. \_\_\_\_\_

|                 |                 |                        |                  |
|-----------------|-----------------|------------------------|------------------|
| 1-3 days a week | 4-6 days a week | 7 days a week          | Every other week |
| Once a month    | Every 2 months  | Every 3 months or less |                  |

4. \_\_\_\_\_  
 1-3 days a week      4-6 days a week      7 days a week      Every other week  
 Once a month      Every 2 months      Every 3 months or less

5. \_\_\_\_\_  
 1-3 days a week      4-6 days a week      7 days a week      Every other week  
 Once a month      Every 2 months      Every 3 months or less

53. Do you think these herbal medicines control your high blood pressure?

If yes, why do you think so?

54. When you use herbal medicine, do you still take your medication from the doctor as prescribed?

Yes      No

If no, what do you do?

55. Have you received information about alternative treatments?

Yes      No

If Yes, what have you heard about alternative treatments for hypertension?

Where or from whom did you receive the information?

56. Have you discussed alternative treatments for hypertension with your healthcare provider?

Yes      No

If no, why not?

57. Why do you choose to use alternative medication to treat your hypertension?

58. When do you take alternative medications?

Do you take them when you cannot afford your prescribed medications?

59. Do you experience any negative side effects when taking alternative medication?

If so, what do you experience?

60. Are there any possible harmful effects of using both herbal and prescription medicines at the same time?

If so, what are possible harmful effects?

### Knowledge Regarding Alternative Treatments

Do you believe:

61. Alternative treatments should **always** be used instead of prescription medication?

Yes      No

62. Alternative treatments are **more** effective at treating hypertension than prescription medication?

Yes      No

63. If you are experiencing unpleasant side effects of prescription medication, is it okay to stop taking the medicine without consulting your healthcare provider?  
 Yes      No
64. Do you think it is okay to use both prescription medication and alternative treatments at the same time to treat hypertension?  
 Yes      No
65. Do you think you should always discuss any alternative treatments for your condition with your healthcare provider?  
 Yes      No

Why or why not?

### **Patient Clinical Data**

5. Date diagnosed with HTN: \_\_\_MM\_\_\_DD\_\_\_YYYY

6. Blood Pressure readings

|                         |                |
|-------------------------|----------------|
| Date: ___MM___DD___YYYY | Reading: _____ |
| Date: ___MM___DD___YYYY | Reading: _____ |
| Date: ___MM___DD___YYYY | Reading: _____ |

7. Weight: \_\_\_\_\_

Date weighed: \_\_\_MM\_\_\_DD\_\_\_YYYY

8. Height: \_\_\_\_\_

Date measured: \_\_\_MM\_\_\_DD\_\_\_YYYY
